# Supplementary material
Source: Springer Nature journal article supplement (https://www.springermedizin.de/resource/supplementary/12865_2009_298_MOESM7_ESM.pdf/9427698)

Control

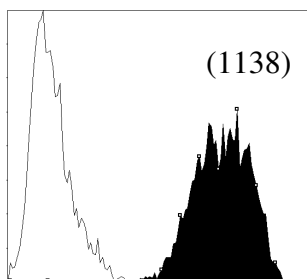

100  $\mu$ M Taxol

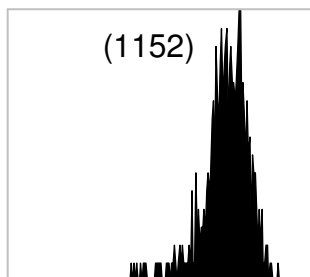

Taxol + anti-TLR4

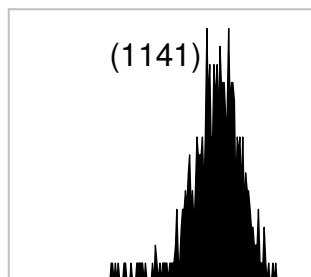

LPS (1  $\mu$ g/ml)

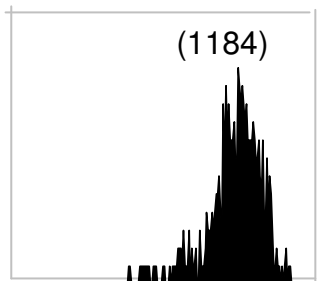

LPS + anti-TLR4

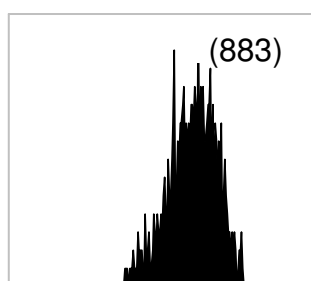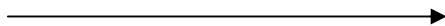

HLA DR

Supplement: MOESM7 [file 9427698]
